# Supplementary material for: Pharmaceutical Industry’s Engagement in the Global Equitable Distribution of COVID-19 Vaccines: Corporate Social Responsibility of EUL Vaccine Developers
Source: MDPI journal article supplement (doi:10.3390/vaccines9101183), 2021-10-15
Supplement: s1 [file s1]

**Table S1.** List of EUL listed COVID-19 vaccines

| No. | Vaccine Developer  | Name of Vaccine                                                      | Type of Vaccine                 | Emergency Use Listing (EUL) listed |
|-----|--------------------|----------------------------------------------------------------------|---------------------------------|------------------------------------|
| 1   | Pfizer/BioNTecch   | BNT162b2/COMIRNATY<br>Tozinameran (INN)                              | RNA                             | 31/12/2020                         |
| 2   | AstraZeneca-Oxford | AZD1222 Vaxzevria<br>Covishield (ChAdOx1_nCoV-19) <sup>1</sup>       | Non-Replicating Viral<br>Vector | 16/04/2021<br>15/02/2021           |
| 3   | Janssen            | Ad26.COV2.S                                                          | Non-Replicating Viral<br>Vector | 12/03/2021                         |
| 4   | Moderna            | mRNA-1273                                                            | RNA                             | 30/03/2021                         |
| 5   | Sinopharm          | SARS-CoV-2 Vaccine (Vero Cell),<br>Inactivated (InCoV)               | Inactivated                     | 07/05/2021                         |
| 6   | Sinovac            | COVID-19 Vaccine (Vero Cell),<br>Inactivated/Coronavac <sup>TM</sup> | Inactivated                     | 01/06/2021                         |

<sup>1</sup> Notes: the Covishield Vaccine is listed as a separate developer (Serum Institute of India) in the status of COVID-19 Vaccines within WHO EUL/PQ evaluation process [43]. In this study, we analyzed AZD1222 Vaxvria and Covishield vaccine together as a vaccine made by a same developer: AstraZeneca-Oxford.

**Table S2.** Categories and indicators measured for the Access to Medicine Index.

| Access to Medicine Index |                                | Modified Categories for this study    |                                        |
|--------------------------|--------------------------------|---------------------------------------|----------------------------------------|
| Technical Areas          | Priority Topics                | Technical Areas                       | Indicators                             |
| Governance of Access     | Responsible business practices |                                       |                                        |
|                          | Governance and Strategy        |                                       |                                        |
| Research and Development | Access planning                | Research and Development (3.1)        | Effectiveness (3.1.1)                  |
|                          | Product development            |                                       | Funding (3.1.2)                        |
|                          | Building R&D Capacity          |                                       | Profit Generation (3.1.2)              |
|                          |                                | Transparency and Accountability (3.2) | Clinical Trials (3.2.1)                |
|                          |                                |                                       | Vaccine Contracts (3.2.2)              |
| Product Delivery         |                                | Product Delivery (3.3)                | COVAX % (3.3.1)                        |
|                          |                                |                                       | LMIC % (3.3.2)                         |
|                          | Equitable access strategies    |                                       | Equitable Pricing (3.3.3)              |
|                          | Intellectual property Strategy |                                       | Intellectual Property Strategy (3.3.4) |
|                          | Quality and supply             |                                       |                                        |
|                          | Licensing quality              |                                       |                                        |
|                          | Product donations              |                                       |                                        |
|                          | Registration                   |                                       |                                        |
|                          | Inclusive business models      |                                       |                                        |
|                          | Local manufacturing            |                                       | Manufacturing Agreements (3.3.5)       |
|                          | Health systems strengthening   |                                       |                                        |

**Table S3.** Source of Materials

| Result | Source                                                                         | Source type                                                          | Search methodology                                        | Date Limit for search (Last Day Accessed) | Date Published   |
|--------|--------------------------------------------------------------------------------|----------------------------------------------------------------------|-----------------------------------------------------------|-------------------------------------------|------------------|
| 4.1    | [47] Ruchir Agarwal                                                            | Report (IMF)                                                         |                                                           |                                           | May 19, 2021     |
|        | [44] Tan, Y. Covid: What do we know about China's coronavirus vaccines?        | News Article (BBC News)                                              | Google search for characteristic of COVID-19 vaccines     | Jan 2020 ~ Aug 2021 (15 Sep 2021)         | 14 January, 2021 |
|        | [8] COVID-19 vaccine tracker                                                   | Internet Database (Lancet Global Health)                             |                                                           |                                           | May 2021         |
|        | [48] COVID-19 Vaccines R&D Investments                                         | Report (The Knowledge Network on Innovation and Access to Medicines) | Integrated data on funding companies received from report | Jan 2020 ~ Aug 2021 (23 Sep 2021)         | May 2021         |
|        | [49] Pfizer, Pfizer reports strong second-quarter 2021 results                 | Financial Report (Pfizer)                                            | Financial report from official company website or SEC.gov | Jan 2021 ~ Aug 2021 (9 Oct 2021)          | July 4, 2021     |
|        | [56] Pfizer, Pfizer reports strong First-quarter 2021 Results.                 |                                                                      |                                                           |                                           | April 4, 2021    |
|        | [57] AstraZeneca, H1 2021 results                                              | Financial Report (AstraZeneca)                                       |                                                           |                                           | July 29, 2021    |
|        | [58] Johnson&Johnson Reports Q2 2021 results                                   | Financial Report (Johnson&Johnson)                                   |                                                           |                                           | July 21, 2021    |
|        | [59] Johnson&Johnson Reports 2021 first-quarter results                        |                                                                      |                                                           |                                           | April 20, 2021   |
|        | [60] Moderna,10-Q Quarterly Report(Q1)                                         | Financial Report (Moderna)                                           |                                                           |                                           | May 6, 2021      |
|        | [61] Moderna, 10-Q Quarterly Report(Q2)                                        |                                                                      |                                                           |                                           | Aug 5, 2021      |
|        | [50] Sinopharm, 2021 Interim Report                                            | Financial Report (Sinopharm)                                         |                                                           |                                           | Oct 9, 2021      |
|        | [51] Parton, J. Covid Shot Makers to Share In Up to \$190 Billion Sales Bonaza | News Article (Bloomberg)                                             | Google search on stance of companies                      | Jan 2020 ~ Aug 2021 (15 Sep 2021)         | May 26, 2021     |
|        | [52] Shapiro, E. Pfizer CEO Albert Bourla Raises Expectations That             | News Article (TIME)                                                  | on profit by COVID-19 vaccines                            |                                           | July 9, 2020     |

|     |                                                                                                                                                  |                                                      |                                                                            |                                   |                 |
|-----|--------------------------------------------------------------------------------------------------------------------------------------------------|------------------------------------------------------|----------------------------------------------------------------------------|-----------------------------------|-----------------|
|     | the Pharmaceutical Giant Can Deliver a COVID-19 Vaccine by Fall.                                                                                 |                                                      |                                                                            |                                   |                 |
|     | [53] Dunn, A. The CEO of the buzzy biotech that's working on a potential coronavirus vaccine just pledged he won't set a high price for the shot | News Article (Business Insider)                      |                                                                            |                                   | May 5, 2020     |
|     | [54] Douoguih, M. Testimony                                                                                                                      |                                                      |                                                                            |                                   | Oct 10, 2020    |
|     | [55] Pangalos, M. Pathway to a Vaccine: Efforts to Develop a Safe, Effective and Accessible COVID-19 Vaccine                                     | Statement submitted to U.S. House of Representatives |                                                                            |                                   | July 21, 2020   |
| 4.2 | [6] Transparency International                                                                                                                   | Report                                               | Reorganized data from the report and internet databases to acquire results | Jan 2020 ~ Aug 2021 (23 Sep 2021) | May 2021        |
|     | [7] UNICEF COVID-19 Vaccine Market Dashboard                                                                                                     | Internet Database                                    |                                                                            |                                   | Updated monthly |
|     | [8] COVID-19 vaccine tracker                                                                                                                     | Internet Database (Lancet Global Health)             |                                                                            |                                   | May 2021        |
|     | [62] Roberts, M. Oxford/AstraZeneca Covid vaccine 'dose error' explained.                                                                        | News Article (BBC)                                   | Reference cited on Report[6]                                               | (23 Sep 2021)                     | Nov 27, 2020    |
| 4.3 | [7] UNICEF, COVID-19 Vaccine Market Dashboard                                                                                                    | Internet Database                                    | Used data until August 2021 to calculate results                           | Jan 2020 ~ Aug 2021 (15 Sep 2021) | Updated monthly |
|     | [68] Innovation, O.U. Expedited access for COVID-19 related IP.                                                                                  | Company Website (AstraZeneca-Oxford)                 | Google search on announcements of companies on IP rights                   | Jan 2020 ~ Aug 2021 (15 Sep 2021) |                 |
|     | [69] Loftus, P. Moderna Vows to Not Enforce Covid-19 Vaccine Patents During Pandemic                                                             | News Article (The Wall Street Journal)               |                                                                            |                                   | Oct 8, 2020     |
|     | [70] McCarthy, S. China backs IP waiver for coronavirus vaccines                                                                                 | News Article (South China Morning Post)              |                                                                            |                                   | May 17, 2021    |

|                                                                           |                        |                          |
|---------------------------------------------------------------------------|------------------------|--------------------------|
| [71] Bourla, A. An open letter from Pfizer Chairman and CEO Albert Bourla | Press Release (Pfizer) | Accessed on 15 July 2021 |
| [72] Eakin, B. J&J's Chief Patent Atty Says COVID IP Waiver Won't Work.   | News Article (Law 360) | April 22, 2021           |
